# Supplementary material
Source: Springer Nature journal article supplement (https://www.springermedizin.de/resource/supplementary/13098_2014_419_MOESM3_ESM.pdf/9670942)
Supplement: MOESM3 [file 9670942]

Change of MetSyn Criteria with Treatment (Post minus Pre)

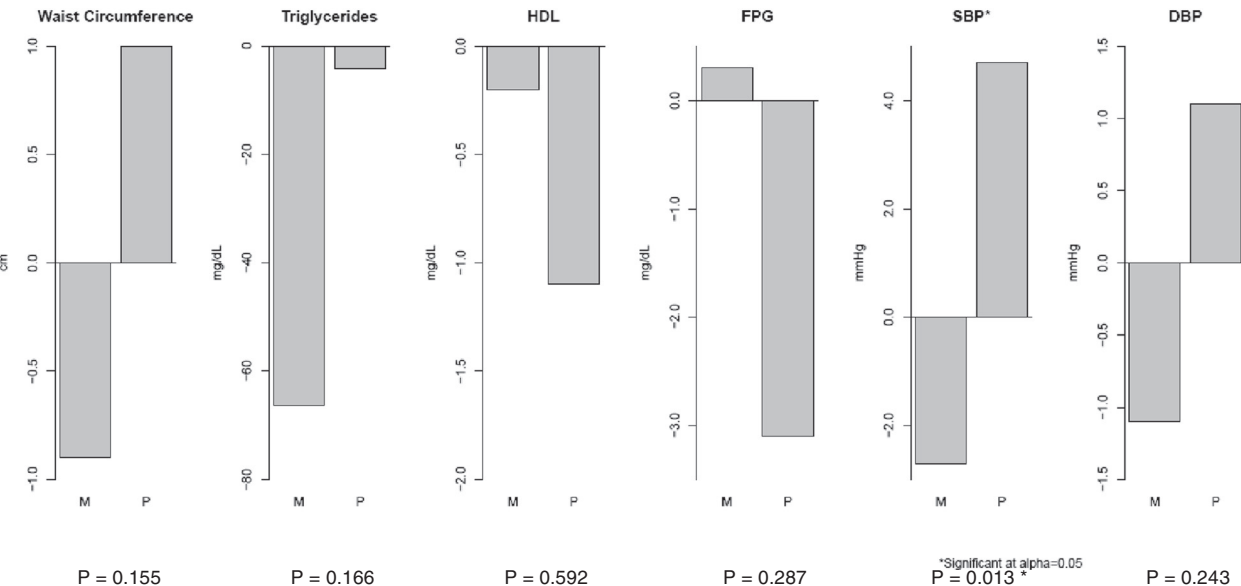

\* Comparison is statistically significant at an alpha of 0.05

DBP = diastolic blood pressure; FPG = fasting plasma glucose; M = melatonin; P = placebo; SBP = systolic blood pressure
